# Supplementary material
Source: ML conference proceedings conference paper supplement (https://openreview.net/forum?id=ddpyTq6B6TU)
Supplement: supplementary_material [file attachment]

---

**Query:** 端午节的由来 (*The Origin of the Dragon Boat Festival*)

西晋《风土记》记载：“仲夏端午。端者，初也。”每月有三个五日，头一个五日就是“端五”。五月初五是端午，端午节又称端阳节、龙舟节、浴兰节，是中华民族的传统节日。形成于先秦，发展于汉末魏晋，兴盛于唐，端午节在两千多年的发展过程中，将文化血脉与家国情怀一并赓续。2009年端午节入选第一批国家级非物质文化遗产名录。端午节成为国家法定节假日。端午节成功入选人类非物质文化遗产代表作名录，成为人类共同的非物质文化遗产。( *The “Feng Tu Ji” of the Western Jin Dynasty records: “The Midsummer Dragon Boat Festival. Duan, is the beginning.” There are three five-days a month, and the first one is the “Duanwu”. The fifth day of May is the Dragon Boat Festival. The Dragon Boat Festival is also known as the Dragon Boat Festival, the Dragon Boat Festival, and the Yulan Festival. It is a traditional festival of the Chinese nation. Formed in the Pre-Qin Dynasty, developed in the Wei-Jin Dynasty at the end of the Han Dynasty, and prospered in the Tang Dynasty, the Dragon Boat Festival has inherited its culture and patriotism in the course of more than two thousand years of development. In 2009, the Dragon Boat Festival was selected into the first batch of national intangible cultural heritage lists. The Dragon Boat Festival has become a national holiday. The Dragon Boat Festival was successfully selected as the representative list of human intangible cultural heritage, becoming the common intangible cultural heritage of mankind.* )

---

**Query:** 端午节习俗 (*Customs of the Dragon Boat Festival*)

今天是我国的传统节日——端午节。端午节又称端阳节、龙舟节等，是中国四大传统节日之一。端午节俗以祈福纳祥、压邪攘灾等形式展开，内容丰富多彩，热闹喜庆。祈福纳祥类习俗主要有划龙舟与祭龙，压邪攘灾类习俗主要有挂艾草、浸龙舟水、洗草药水、拴五色彩线等，节庆食品主要有粽子、五黄等。端午节期间通过各种传统民俗活动展演，既能丰富群众精神文化生活，又能传承和弘扬传统文化。( *Today is the Dragon Boat Festival. Dragon Boat Festival, also known as Duanyang Festival, is one of the four traditional festivals in China. The custom of the Dragon Boat Festival is carried out in the form of praying for good fortune, suppressing evil spirits and fighting disasters, which is very colorful and bustling. The customs of praying for happiness mainly include rowing dragon boats and offering sacrifices to the dragon. The customs of suppressing evil and fighting disasters mainly include hanging wormwood, soaking the dragon boat in water, washing herbal, and tying the five-color thread. The festive food mainly includes rice dumplings and “five yellow”. During the Dragon Boat Festival, various traditional activities and performances not only enrich our spiritual and cultural life, but also inherit and promote traditional culture.* )

---

**Query:** 端午节活动 (*Activities of the Dragon Boat Festival*)

端午节期间，各地组织丰富多彩的民俗活动，宣传传统文化、弘扬爱国情怀。“我们的节日·诗魂爱国志、粽香端午情”主题活动正在如火如荼的举行着。来自亚美尼亚的留学生杨来中国两年了，还是第一次体验包粽子，这给她留下了深刻的印象。“我刚才包了两三个粽子，我觉得好玩，以前包过饺子，那也挺有意思。我特别喜欢中国传统文化，想要了解更多。”( *During the Dragon Boat Festival, a variety of activities were organized in various places to promote traditional culture and patriotism. The activity of “Our Festival ‘Poetry and Patriotism, Zongxiang Dragon Boat Festival’” is being held in full swing. Yang, a foreign student from Armenia, has been in China for two years, and this is the first time she make zongzi, which left a deep impression on her. “I just made two or three zongzi. I think it is fun. I have made dumplings before, which is also very interesting. I especially like traditional Chinese culture and want to learn more.”* )

---

---

**Query:** 端午节影响 (*The impact of the Dragon Boat Festival*)

---

端午节是中国传统文化特色比较浓郁的节日，我国南方也有赛龙舟的风俗。它的文化内涵越来越丰富，就使得我们在休闲的这三天中，把我们中国的传统文化和我们的休闲消费结合起来。不仅是促进消费本身，也在提升消费品位方面发挥重要的作用。( *The Dragon Boat Festival is a festival with relatively strong traditions and cultural characteristics, and there is also the custom of dragon boat racing in the south. Its cultural connotation is becoming more and more abundant, combining Chinese culture with leisure consumption. It not only promotes consumption itself, but also plays an important role in improving consumer taste.*  )

---

**Query:** 端午节旅游 (*The Dragon Boat Festival Holiday Tourism*)

---

考试季的端午假期挡不住爱玩游客的脚步。一年一度的端午节即将来临。今年端午小长假恰逢高考，探亲游及毕业游等客流叠加，令端午期间旅游需求上涨。端午小长假旅游消费数据显示，端午节小长假期间机票价格相较于“五一”略低，铁路客流仍将呈现“双驼峰”走势，高铁游成为端午小长假期间中短途出游的首选。另一方面，奔着美食出游也成为端午假期的出游方向之一。大数据显示，6月7日、6月8日和6月9日起飞的国内航班平均票价分别为553元、591元、529元（均不含税费），国际机票平均票价分别为743元、757元和924元（均不含税费），整体票价较“五一”小长假期间略低。目前为止，端午国内机票预订量较大的航线主要有：上海-深圳、西安-广州、北京-深圳、上海-广州、广州-上海、深圳-上海、昆明-广州、南宁-上海、北京-广州、上海-哈尔滨。端午国际机票预订量较大的航线主要有：上海-东京、首尔-青岛、上海-首尔、北京-东京、北京-首尔、广州-首尔、曼谷-清迈、深圳-吉隆坡、芝加哥-北京等。( *The examination season did not stop tourists from traveling on the Dragon Boat Festival. The annual Dragon Boat Festival is approaching. This year's Dragon Boat Festival holiday coincides with the college entrance examination, family visits, graduation tours, and other passenger flows increase tourism demand during the Dragon Boat Festival. The tourism big data for the Dragon Boat Festival holiday show that the ticket price during the Dragon Boat Festival holiday is slightly lower than that of the "May Day", and that the railway passenger flow shows a "double hump" trend. The high-speed rail tour has become the first choice for trips during the Dragon Boat Festival holiday. On the other hand, food has also become one of the purpose for traveling during the Dragon Boat Festival holiday. According to the big data, the average ticket prices of domestic flights departing on June 7, June 8 and June 9 are 553 yuan, 591 yuan, and 529 yuan (all excluding taxes and fees), respectively. The average international ticket fares are 743 yuan, 757 yuan and 924 yuan (all excluding taxes and fees), respectively, and the overall fare is slightly lower than that during the May Day holiday. So far, the main domestic routes are: Shanghai-Shenzhen, Xi'an-Guangzhou, Beijing-Shenzhen, Shanghai-Guangzhou, Guangzhou-Shanghai, Shenzhen-Shanghai, Kunming-Guangzhou, Nanning-Shanghai, Beijing-Guangzhou, Shanghai-Harbin. The main international routes are: Shanghai-Tokyo, Seoul-Qingdao, Shanghai-Seoul, Beijing-Tokyo, Beijing-Seoul, Guangzhou-Seoul, Bangkok-Chiang Mai, Shenzhen-Kuala Lumpur, Chicago-Beijing, etc.*  )

---

Table 1: A Passage generated by BURT.
